# Supplementary material
Source: publisher site journal article supplement (https://www.dovepress.com/article/358232)
Supplement: Supplementary file 1 [file get_supplementary_file.php]

## Appendix 1: Sensitivity Analysis

A

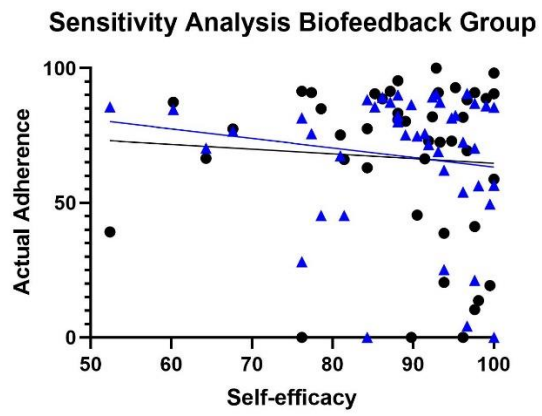

B

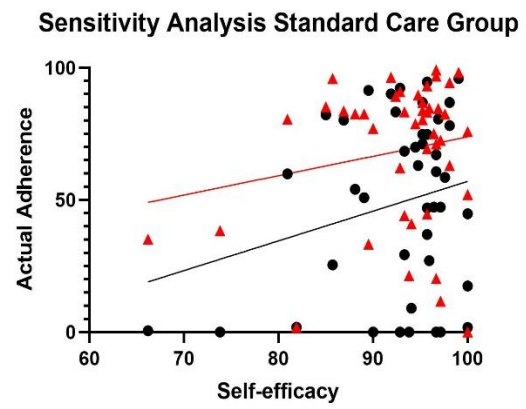

## Appendix 2: \*Asthma Self-Efficacy Questionnaire

This questionnaire is designed to help us get a better understanding of how you manage your asthma. Please rate how certain you are that you can do each of the things described below by writing the appropriate number.

*For each of the following statements, rate how confident you feel by choosing a number from 0 to 100 using the scale given below:*

0      10      20      30      40      50      60      70      80      90      100

Cannot do at all                                      Moderately can do                                      Highly certain can do

| Question                                                                             | Confidence (0-100) |
|--------------------------------------------------------------------------------------|--------------------|
| <b>MEDICATION</b>                                                                    |                    |
| <b>I am confident that:</b>                                                          |                    |
| I know how to correctly use my asthma inhaler                                        |                    |
| I know when to use my asthma medication                                              |                    |
| I know which of my inhalers I need to take                                           |                    |
| I know what my preventer inhaler is for                                              |                    |
| I know what my reliever inhaler is for                                               |                    |
| <b>SYMPTOM MANAGEMENT</b>                                                            |                    |
| <b>I am confident that:</b>                                                          |                    |
| I know how to use my asthma management plan                                          |                    |
| I can be prepared to deal with an asthma attack                                      |                    |
| I know how to stay calm when I am having trouble breathing                           |                    |
| I know how to measure my peak flow daily                                             |                    |
| I know how to control my asthma when my peak flow level goes lower than it should be |                    |
| I know when I am out of breath because of my asthma rather than because of exercise  |                    |

|                                                                                              |  |
|----------------------------------------------------------------------------------------------|--|
| I know when I am out of breath because of my asthma rather than because I feel a bit panicky |  |
| I know when to use my inhaler to manage a serious breathing problem                          |  |
| I know when I might need to go to hospital because of a serious breathing problem            |  |
| I know what to do to avoid triggers for my asthma                                            |  |
| <b>ASTHMA BELIEFS</b>                                                                        |  |
| <b>I am confident that:</b>                                                                  |  |
| I am in control of my asthma                                                                 |  |
| I can do physical activity such as sports                                                    |  |
| I can have a normal life                                                                     |  |
| I can do the things that I want to do                                                        |  |
| I can control my asthma day-to-day                                                           |  |
| <b>FRIENDS AND FAMILY</b>                                                                    |  |
| <b>I am confident that:</b>                                                                  |  |
| I can take my inhalers in front of my friends                                                |  |
| I can take my inhalers in front of my family                                                 |  |
| I can talk honestly to my friends about my asthma                                            |  |
| I can talk honestly to my family about my asthma                                             |  |
| I can talk honestly to my doctor or nurse about my asthma                                    |  |
| I can ask my friends for help if I am having trouble breathing or having an asthma attack    |  |
| I can ask my family for help if I am having trouble breathing or having an asthma attack     |  |

\*Adapted from the Adolescent Asthma Self-Efficacy Questionnaire (AASEQ): Holley S, Knibb R, Latter S, et al. Development and validation of the Adolescent Asthma Self-Efficacy Questionnaire (AASEQ). *Eur Respir J* 2019.
